# Supplementary material for: Evaluation of design flood estimates – a case study for Norway
Source: Oxford University Press journal article supplement (doi:10.2166/nh.2017.068), 2017-09-26
Supplement: nh2017068supp.docx [file nh2017068supp.docx]

**Supplementary materials**

Table S1 | Equations for the probability distribution functions used in this study

| Gumbel: (Fisher & Tippett 1928; Embrechts *et al*. 1997) |  |
| --- | --- |
| GEV: (Fisher & Tippett 1928; Embrechts *et al*. 1997) |  |
| Gamma: (Weisstein 2016) |  |
| Pearson III: (US Water Resources Council 1982) |  |
| Generalized logistic: (Hosking & Wallis 1997) |  |

Table S2 | Equations for the probability density functions used in this study

| Gumbel: (Fisher & Tippett 1928; Embrechts *et al*. 1997) |  |
| --- | --- |
| GEV: (Fisher & Tippett 1928; Embrechts *et al*. 1997) |  |
| Gamma: (Weisstein 2016) |  |
| Pearson type III: (US Water Resources Council 1982) |  |
| Generalized logistic: (Hosking & Wallis 1997) |  |

Table S3 | Equations for the quantile functions used in this study

| Gumbel |  |
| --- | --- |
| GEV |  |
| Gamma | No explicit form, solved numerically (see Best & Roberts 1975) |
| Pearson type III | No explicit form, given in tables (US Water Resources Council 1982) |
| Generalized logistic |  |

**Table S4** | The ordinary moment estimates for selected distributions (see, e.g., Bezak *et al*. 2014)

|  | **Moments** | **Parameters** |
| --- | --- | --- |
| Gumbel: (Stedinger *et al*. 1993) |  |  |
| GEV: (Stedinger *et al*. 1993) |  |  |
| Gamma: (Weisstein 2016) |  |  |
| Pearson type III: (Basak & Balakrishnan 2012) |  |  |
| Generalized logistic: (Shin *et al*. 2009) |  |  |

*, Г() is the gamma function and *gr* existst only if *β* < 1/r.

**Table S5** | The linear moment estimates for selected distributions (see, e.g., Bezak *et al*. 2014)

|  | **L-moments** | **Parameters** |
| --- | --- | --- |
| Gumbel: (Hosking & Wallis 1997) |  |  |
| GEV: (Hosking & Wallis 1997) |  |  |
| Gamma: (Hosking 1990) |  |  |
| Pearson type III: (Hosking 1990) |  |  |
| Generalized logistic |  |  |

## REFERENCES

Basak, I. & Balakrishnan, N. 2012 Estimation for the three-parameter gamma distribution based on progressively censored data. *Stat. Methodol*. **9**, 305–319. doi:10.1016/j.stamet.2011.08.005

Best, D. J. & Roberts, D. E. 1975 Algorithm AS 91: The percentage points of the χ 2 distribution. *Appl. Stat*. **24**, 385. doi:10.2307/2347113

Bezak, N., Brilly, M. & Šraj, M. 2014 Comparison between the peaks-over-threshold method and the annual maximum method for flood frequency analysis. *Hydrological Sciences Journal* **59**, 959–977. doi:10.1080/02626667.2013.831174.

Embrechts, P., Klüppelberg, C. & Mikosch, T. 1997 *Modelling Extremal Events*. Springer, Berlin, Heidelberg. doi:10.1007/978-3-642-33483-2

Fisher, R. A. & Tippett, L. H. C. 1928 Limiting forms of the frequency distribution of the largest or smallest member of a sample. *Math. Proc. Cambridge Philos. Soc*. **24**, 180–190. doi:10.1017/S0305004100015681

Hosking, J. R. M. 1990 L-Moments: Analysis and estimation of distributions using linear combinations of order statistics. *J. R. Stat. Soc. Ser. B* **52**, 105–124.

Hosking, J. R. M. & Wallis, J. R. 1997 *Regional Frequency Analysis*. *An Approach Based on L Moments*, 1st edn. Cambridge University Press, Cambridge.

Shin, H., Kim, T., Kim, S. & Heo, J.-H. 2009 Estimation of asymptotic variances of quantiles for the generalized logistic distribution. *Stoch. Environ. Res. Risk Assess*. **24**, 183–197. doi:10.1007/s00477-009-0309-z

Stedinger, J. R., Vogel, R. M. & Foufoula-Georgiou, E. 1993 Frequency analysis of extreme events. In: D. R. Maidment (ed.). *Handbook of Hydrology*. McGraw-Hill, New York.

US Water Resources Council 1982 Guidelines for determining flood flow frequency. Bull. 17B Reston, Virginia, Hydrol. Subcomm. Off. Water Data Coord. US Geol. Surv. 182 p.

Weisstein, E. W. 2016 Gamma Distribution [WWW Document]. MathWorld – A Wolfram Web Resour. URL http://mathworld.wolfram.com/GammaDistribution.html (accessed 18 February 2017).
